# Supplementary material for: Predicted crystal structures of xenon and alkali metals under high pressures
Source: Royal Society of Chemistry journal article supplement (doi:10.1039/d2cp02657k), 2022-01-01
Supplement: d2cp02657k1.pdf [file d2cp02657k1.pdf]

**Supplemental Material for**

**‘Predicted crystal structures of xenon and alkali  
metals under high pressures’**

Yifan Tian,<sup>a</sup> John S. Tse,<sup>a,b</sup> Guangtao Liu <sup>\*a</sup> and Hanyu Liu<sup>a</sup>

<sup>a</sup>State Key Laboratory of Superhard Materials and International Center for Computational  
Method & Software, College of Physics, Jilin University, Changchun 130012, China

<sup>b</sup>Physics and Engineering Physics Department, University of Saskatchewan, S7N 5E2,

Canada

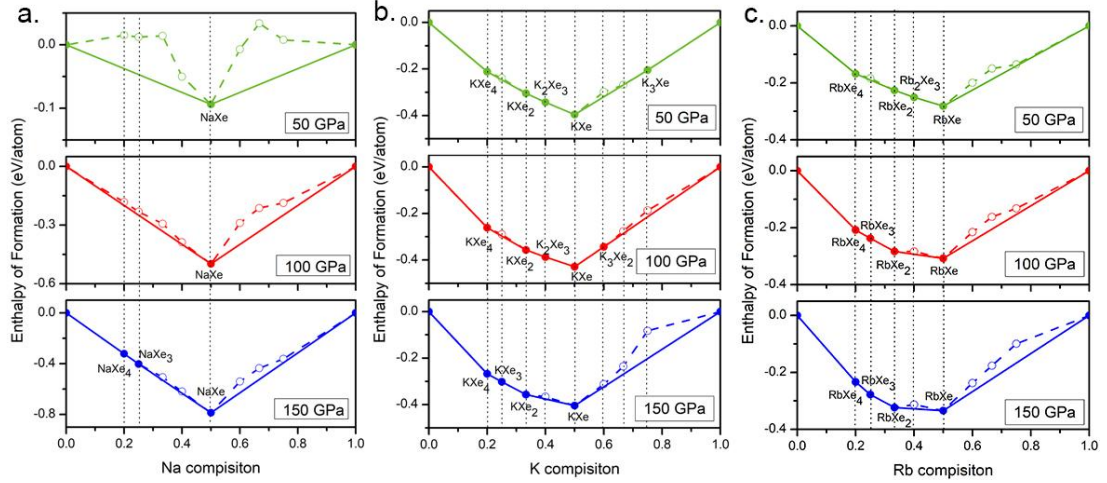

Figure S1. Thermodynamic stabilities of  $M_xXe_y$  compounds ( $M = Na, K$  and  $Rb$ ) (a)  $M = Na$ , (b)  $M = K$  and (c)  $M = Rb$ . The solid circles indicate energetically stable phases against decompositions and open circles located above the convex hull indicate the unstable or metastable structures.

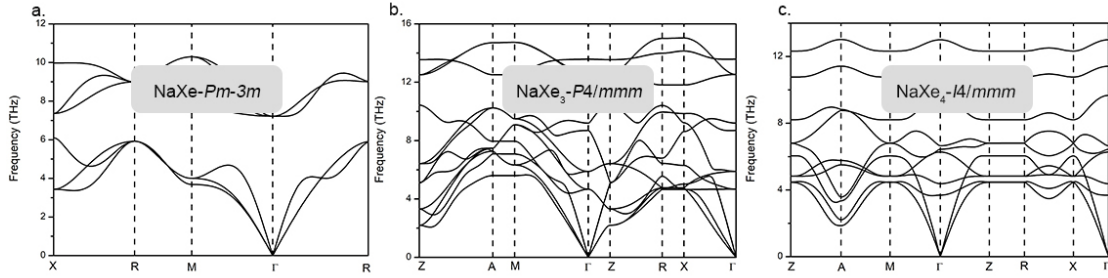

Figure S2. Calculated phonon spectra for various Na–Xe compounds at the respective stable pressure range. (a)  $NaXe(Pm-3m)$  at 30 GPa (b)  $NaXe_3(P4/mmm)$  at 150 GPa (c)  $NaXe_4(I4/mmm)$  at 150 GPa.

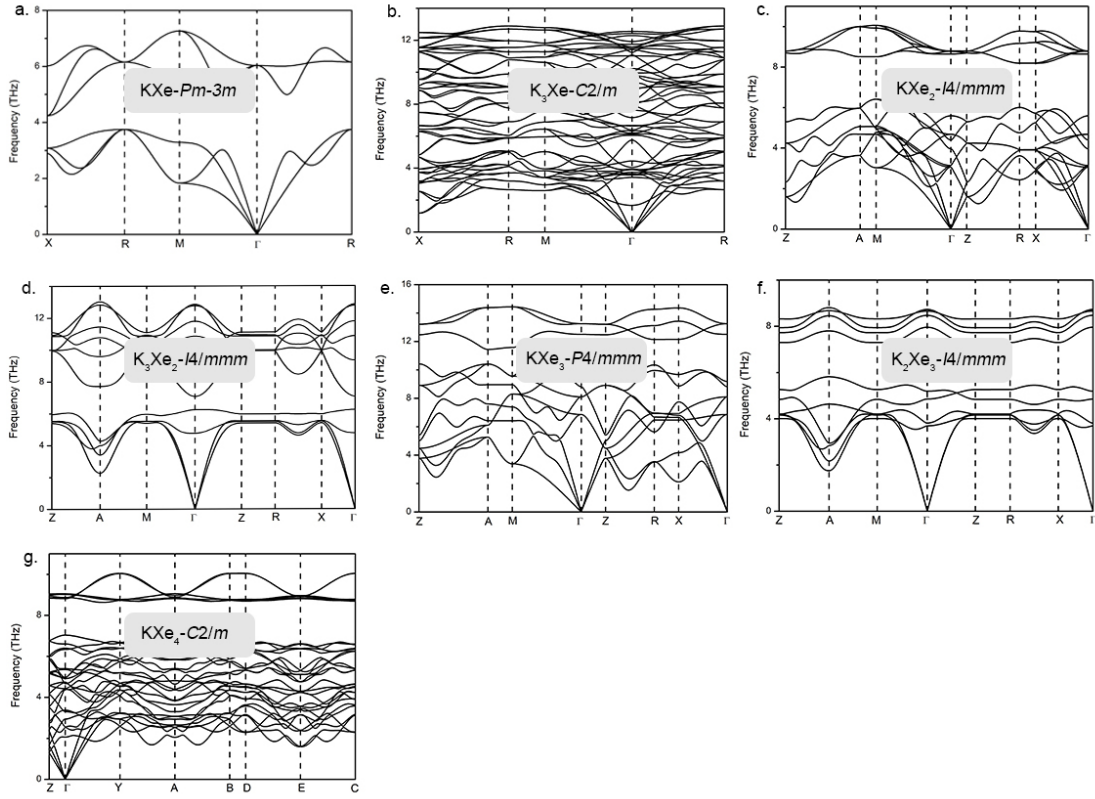

Figure S3. Calculated phonon spectra for various K-Xe compounds at the respective stable pressure range. (a) KXe (*Pm-3m*) at 20 GPa (b)  $K_3Xe$  (*C2/m*) at 50 GPa (c)  $KXe_2$  (*I4/mmm*) at 50 GPa (d)  $K_3Xe_2$  (*I4/mmm*) at 100 GPa (e)  $KXe_3$  (*P4/mmm*) at 150 GPa (f)  $K_2Xe_3$  (*I4/mmm*) at 50 GPa (g)  $KXe_4$  (*C2/m*) at 50 GPa.

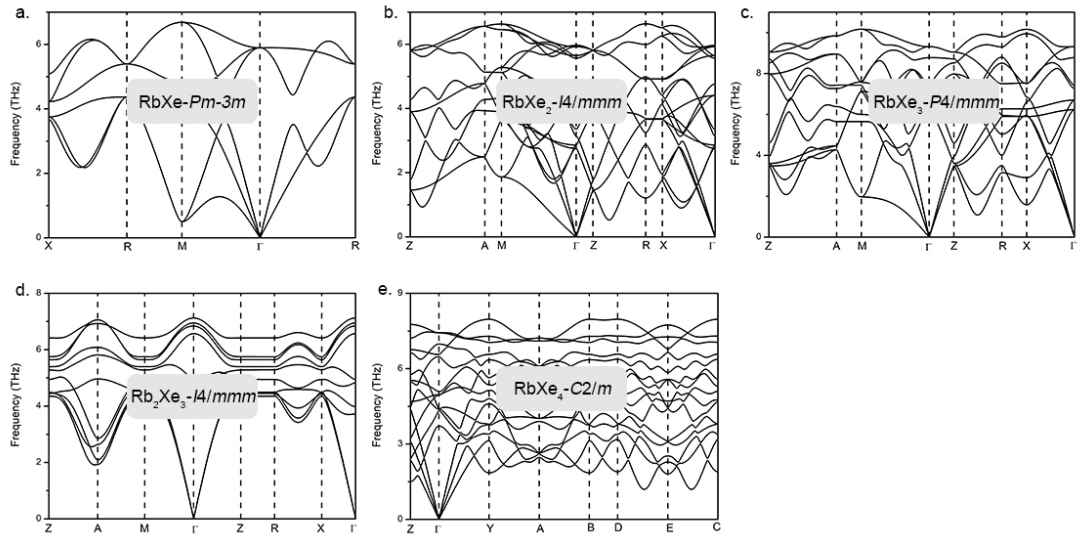

Figure S4. Calculated phonon spectra for various Rb-Xe compounds at the respective stable pressure range. (a) RbXe (*Pm-3m*) at 30 GPa (b)  $RbXe_2$  (*I4/mmm*) at 30 GPa (c)  $RbXe_3$  (*P4/mmm*) at 100 GPa (d)  $Rb_2Xe_3$  (*I4/mmm*) at 50 GPa (e)  $RbXe_4$  (*C2/m*) at 50 GPa.

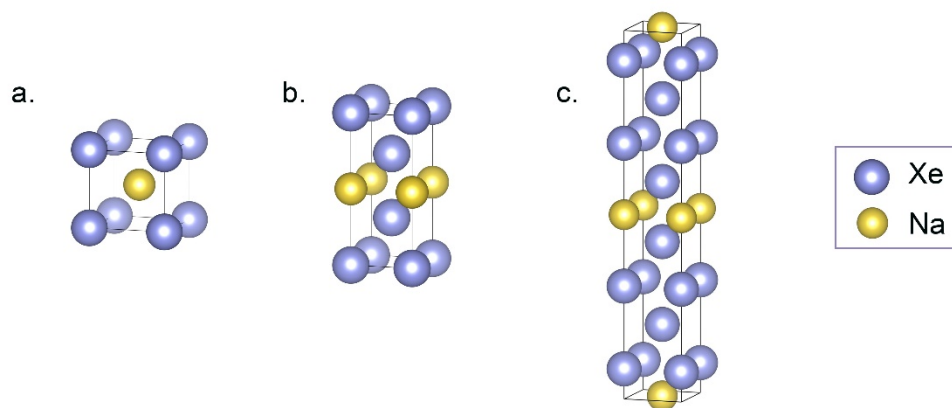

Figure S5. Stable structures of Na–Xe compounds. (a) NaXe ( $Pm-3m$ ) (b) NaXe<sub>3</sub> ( $P4/mmm$ ) (c) NaXe<sub>4</sub> ( $I4/mmm$ ).

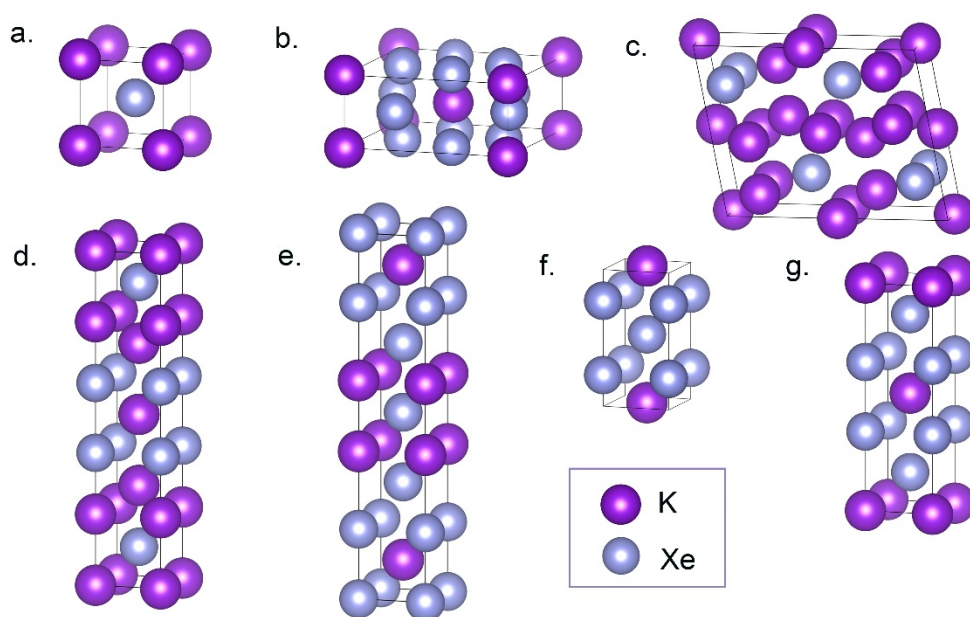

Figure S6. Stable structures of K–Xe compounds. (a)  $Pm-3m$ -KXe (b)  $C2/m$ -KXe<sub>4</sub> (c)  $C2/m$ -K<sub>3</sub>Xe (d)  $I4/mmm$ -K<sub>3</sub>Xe<sub>2</sub> (e)  $I4/mmm$ -K<sub>2</sub>Xe<sub>3</sub> (f)  $P4/mmm$ -KXe<sub>3</sub> (g)  $I4/mmm$ -KXe<sub>2</sub>.

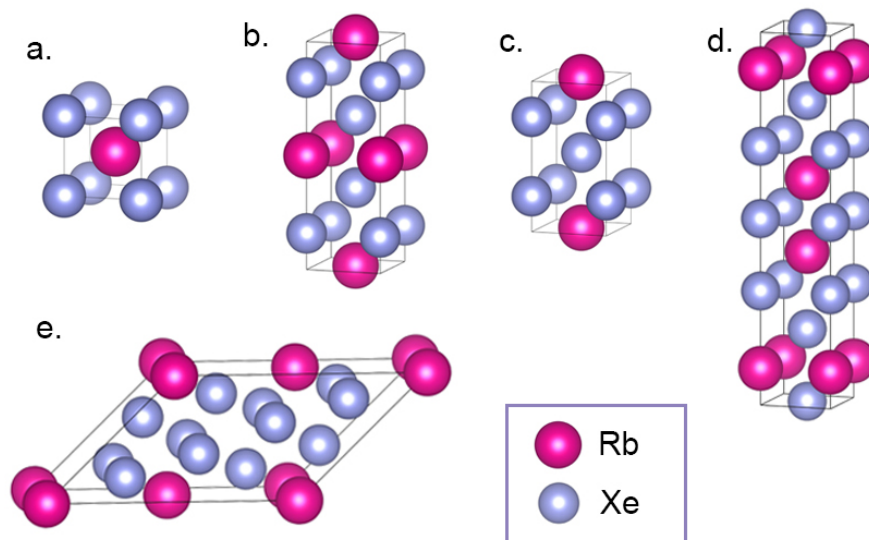

Figure S7. Stable structures of Rb–Xe compounds. (a)  $Pm-3m$ -RbXe (b)  $I4/mmm$ -RbXe<sub>2</sub> (c)  $P4/mmm$ -RbXe<sub>3</sub> (d)  $I4/mmm$ -Rb<sub>2</sub>Xe<sub>3</sub> (e)  $C2/m$ -RbXe<sub>4</sub>.

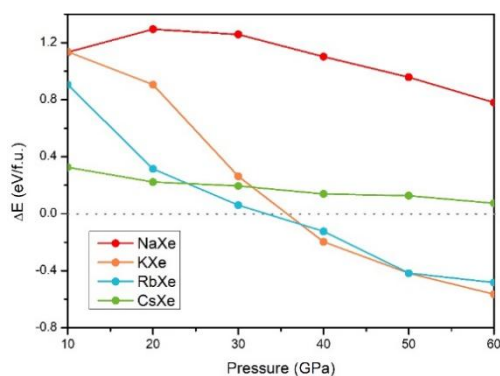

Figure S8. The change of internal energy of compounds NaXe, KXe, RbXe and CsXe versus pressure.

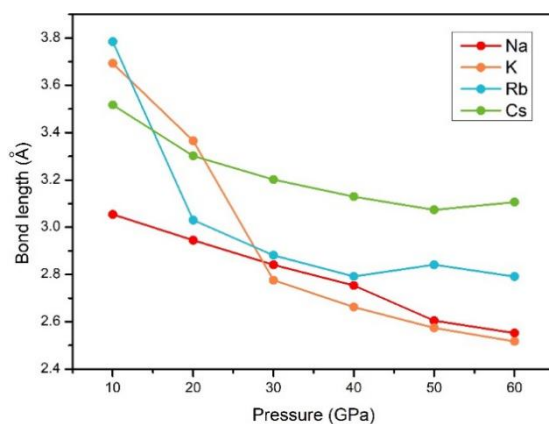

Figure S9. Bond lengths of elements Na, K, Rb and Cs under increasing pressure.

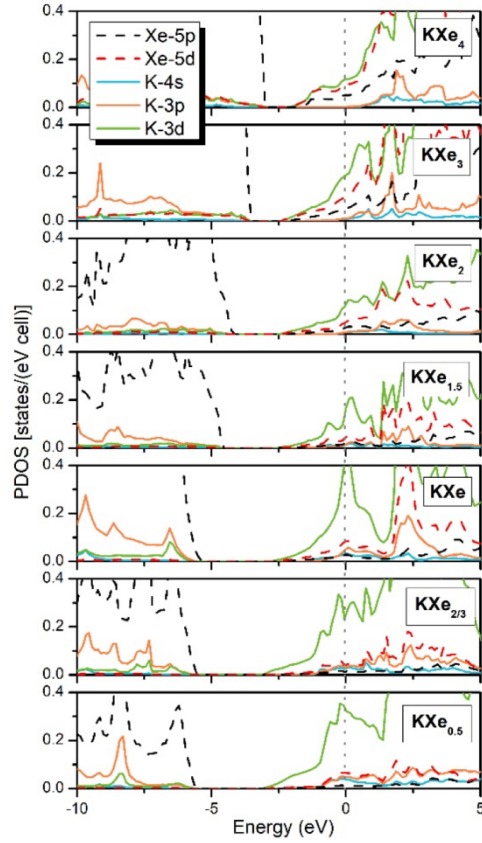

Figure S10. The calculated projected densities of states (PDOS) of various Xe–K compounds at 100 GPa. The vertical dotted line indicates the Fermi energy.

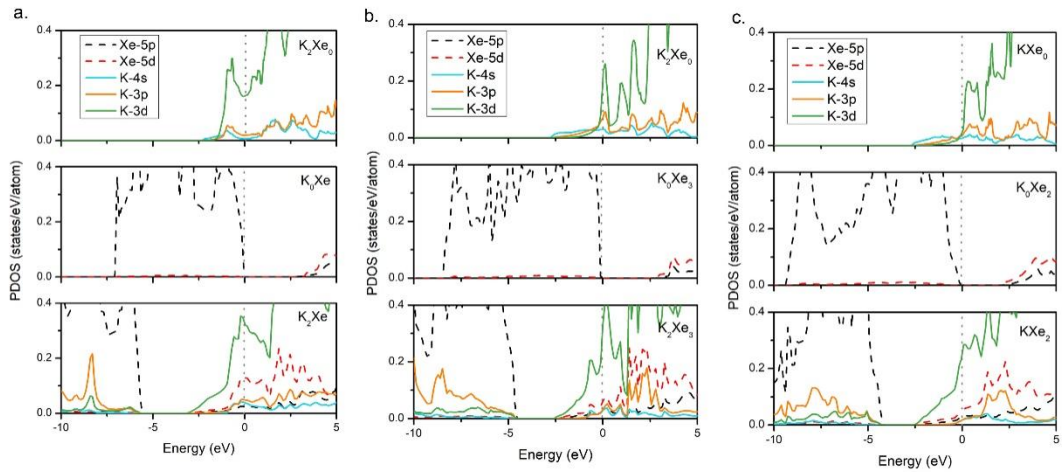

Figure S11. Projected densities of states (PDOS) of different compounds (a)  $K_2Xe$  (b)  $K_2Xe_3$  and (c)  $KXe_2$ .

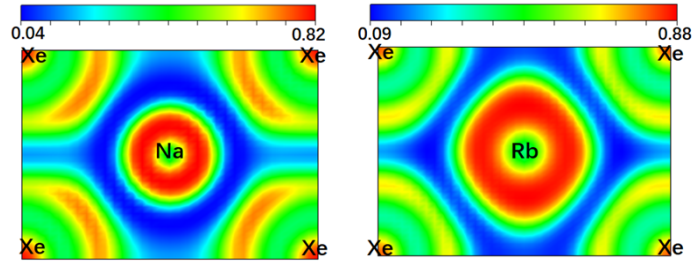

Figure S12. Electron location function (ELF) of the compound NaXe and RbXe (space group  $Pm-3m$ ) in the (110) plane at 100 GPa.

Table S1. Crystal Structure Information of Stable Na–Xe, K–Xe and Rb–Xe Compounds

| Phases                         | P (GPa) | lattice parameters ( $\text{\AA}$ , $^\circ$ ) | atomic coordinates (fractional) |       |     |       |
|--------------------------------|---------|------------------------------------------------|---------------------------------|-------|-----|-------|
| NaXe                           | 50      | $a = b = c = 3.234$                            | Na(1a)                          | 0     | 0   | 0     |
| $Pm-3m$                        |         | $a = \beta = \gamma = 90.0$                    | Xe(1b)                          | 0.5   | 0.5 | 0.5   |
| NaXe <sub>3</sub>              | 150     | $a = b = 2.914$                                | Na(1b)                          | 0     | 0   | 0.5   |
| $P4/mmm$                       |         | $c = 6.950$                                    | Xe(2h)                          | 0.5   | 0.5 | 0.289 |
|                                |         | $a = \beta = \gamma = 90.0$                    | Xe(1a)                          | 0     | 0   | 0     |
| NaXe <sub>4</sub>              | 150     | $a = b = 2.912$                                | Na(2b)                          | 0.5   | 0.5 | 0     |
| $I4/mmm$                       |         | $c = 17.963$                                   | Xe(4e)                          | 0     | 0   | 0.306 |
|                                |         | $a = \beta = \gamma = 90.0$                    | Xe(4e)                          | 0.5   | 0.5 | 0.418 |
| KXe                            | 50      | $a = b = c = 3.373$                            | K(1a)                           | 0     | 0   | 0     |
| $Pm-3m$                        |         | $a = \beta = \gamma = 90.0$                    | Xe(1b)                          | 0.5   | 0.5 | 0.5   |
| KXe <sub>2</sub>               | 50      | $a = b = 3.342$                                | K(2b)                           | 0     | 0   | 0.5   |
| $I4/mmm$                       |         | $c = 11.062$                                   | Xe(4e)                          | 0     | 0   | 0.847 |
|                                |         | $a = \beta = \gamma = 90.0$                    |                                 |       |     |       |
| K <sub>2</sub> Xe <sub>3</sub> | 50      | $a = b = 3.155$                                | K(4e)                           | 0     | 0   | 0.097 |
| $I4/mmm$                       |         | $c = 16.513$                                   | Xe(4e)                          | 0     | 0   | 0.310 |
|                                |         | $a = \beta = \gamma = 90.0$                    | Xe(2b)                          | 0.5   | 0.5 | 0     |
| K <sub>3</sub> Xe              | 50      | $a = 10.237$                                   | K(4i)                           | 0.165 | 0   | 0.560 |
| $C2/m$                         |         | $b = 3.464$                                    | K(4i)                           | 0.168 | 0   | 0.866 |
|                                |         | $c = 8.029$                                    | K(2b)                           | 0     | 0.5 | 0     |
|                                |         | $a = \gamma = 90$                              | K(2d)                           | 0     | 0.5 | 0.5   |
|                                |         | $\beta = 79.306$                               | Xe(4i)                          | 0.887 | 0   | 0.774 |
| KXe <sub>4</sub>               | 50      | $a = 11.270$                                   | K(4i)                           | 0.25  | 0   | 0.25  |
| $C2/m$                         |         | $b = 3.429$                                    | Xe(4i)                          | 0.151 | 0   | 0.566 |
|                                |         | $c = 11.263$                                   | Xe(4i)                          | 0.933 | 0   | 0.150 |
|                                |         | $a = \gamma = 90$                              | Xe(4i)                          | 0.933 | 0.5 | 0.651 |
|                                |         | $\beta = 89.971$                               | Xe(4i)                          | 0.151 | 0.5 | 0.066 |
| K <sub>3</sub> Xe <sub>2</sub> | 100     | $a = b = 3.121$                                | K(4e)                           | 0     | 0   | 0.212 |
| $I4/mmm$                       |         | $c = 15.400$                                   | K(2a)                           | 0.5   | 0.5 | 0.5   |
|                                |         | $a = \beta = \gamma = 90.0$                    | Xe(4e)                          | 0.5   | 0.5 | 0.104 |
| RbXe                           | 50      | $a = b = c = 3.460$                            | Rb(1a)                          | 0.5   | 0.5 | 0.5   |
| $Pm-3m$                        |         | $a = \beta = \gamma = 90.0$                    | Xe(1b)                          | 0     | 0   | 0     |

|                                     |     |                  |        |       |     |       |
|-------------------------------------|-----|------------------|--------|-------|-----|-------|
| <b>RbXe<sub>2</sub></b>             | 50  | a = b = 3.489    | Rb(2b) | 0.5   | 0.5 | 0     |
| <b>I4/mmm</b>                       |     | c = 10.648       | Xe(4e) | 0     | 0   | 0.157 |
|                                     |     | a = β = γ = 90.0 |        |       |     |       |
| <b>Rb<sub>2</sub>Xe<sub>3</sub></b> | 50  | a = b = 3.453    | Rb(4e) | 0     | 0   | 0.902 |
| <b>I4/mmm</b>                       |     | c = 17.844       | Xe(4e) | 0     | 0   | 0.307 |
|                                     |     | a = β = γ = 90.0 | Xe(2b) | 0     | 0   | 0.5   |
| <b>RbXe<sub>3</sub></b>             | 100 | a = b = 3.347    | Rb(1c) | 0.5   | 0.5 | 0     |
| <b>P4/mmm</b>                       |     | c = 6.486        | Xe(1d) | 0.5   | 0.5 | 0.5   |
|                                     |     | a = β = γ = 90.0 | Xe(2g) | 0     | 0   | 0.763 |
| <b>RbXe<sub>4</sub></b>             | 50  | a = 11.325       | Rb(2a) | 0     | 0   | 0     |
| <b>C2/m</b>                         |     | b = 3.495        | Xe(4i) | 0.411 | 0   | 0.199 |
|                                     |     | c = 8.010        | Xe(4i) | 0.211 | 0   | 0.623 |
|                                     |     | a = γ = 90       |        |       |     |       |
|                                     |     | β = 134.993      |        |       |     |       |
